# Supplementary material for: Epithelial and Mesenchymal Pancreatic Cancer Cells Exhibit Different Stem Cell Phenotypes Being Associated with Different Metastatic Propensity
Source: Preprints.org preprint supplement (doi:10.20944/preprints202311.1083.v1), 2023-11-16
Supplement: Supplementary file 2 [file supplementary]

Archive with 4 entries (4 files):
- Legends to Supplementary Figures.pdf
- Supplementary Figure 1.pdf
- Supplementary Figure 2.pdf
- Supplementary Figure 3.pdf
