# Supplementary material for: Epithelial and Mesenchymal Pancreatic Cancer Cells Exhibit Different Stem Cell Phenotypes Being Associated with Different Metastatic Propensity
Source: Preprints.org preprint supplement (doi:10.20944/preprints202311.1083.v1), 2023-11-16

A)

Parental PDAC cells

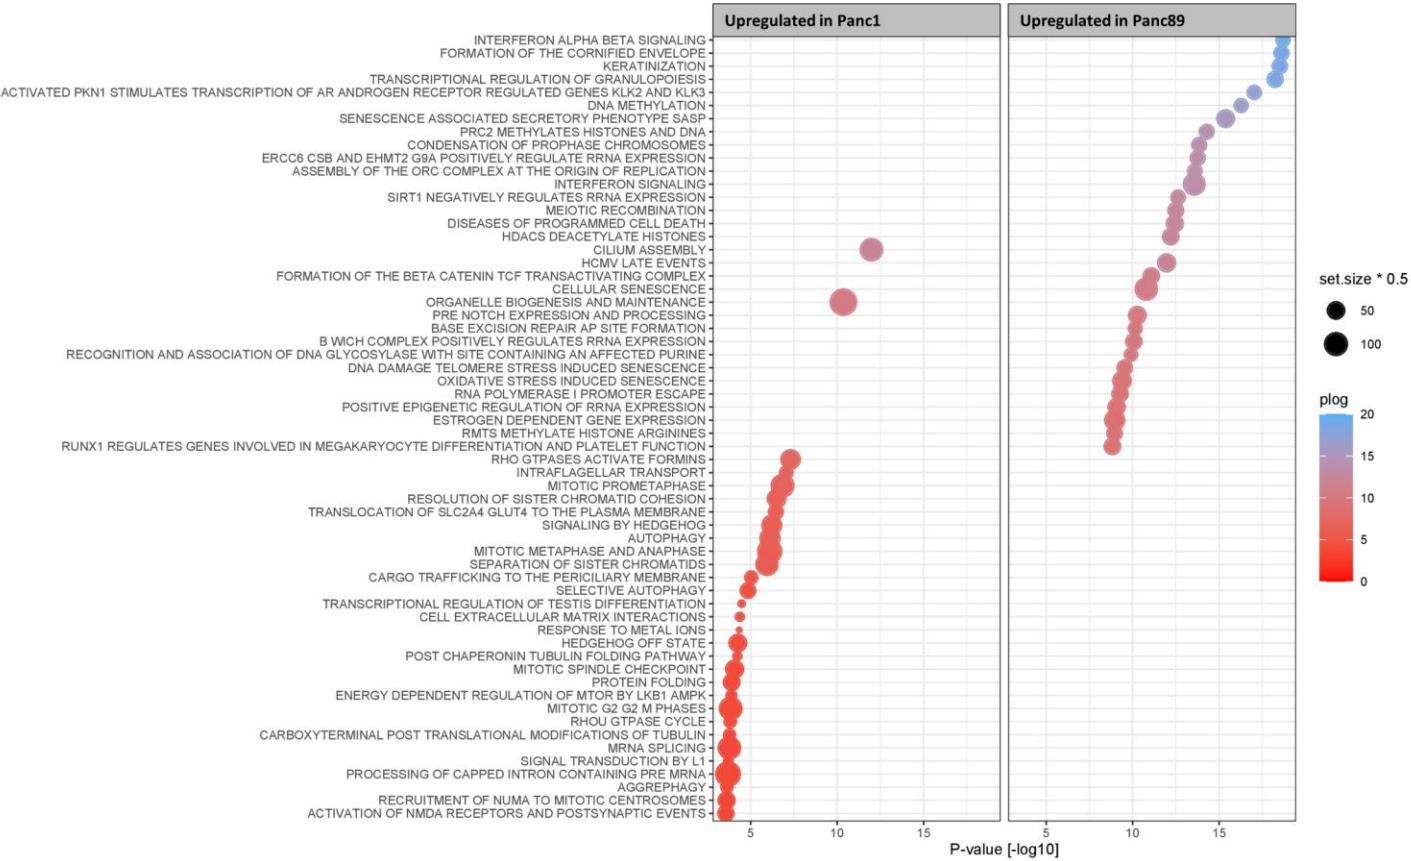

B)

Panc1 cell clones

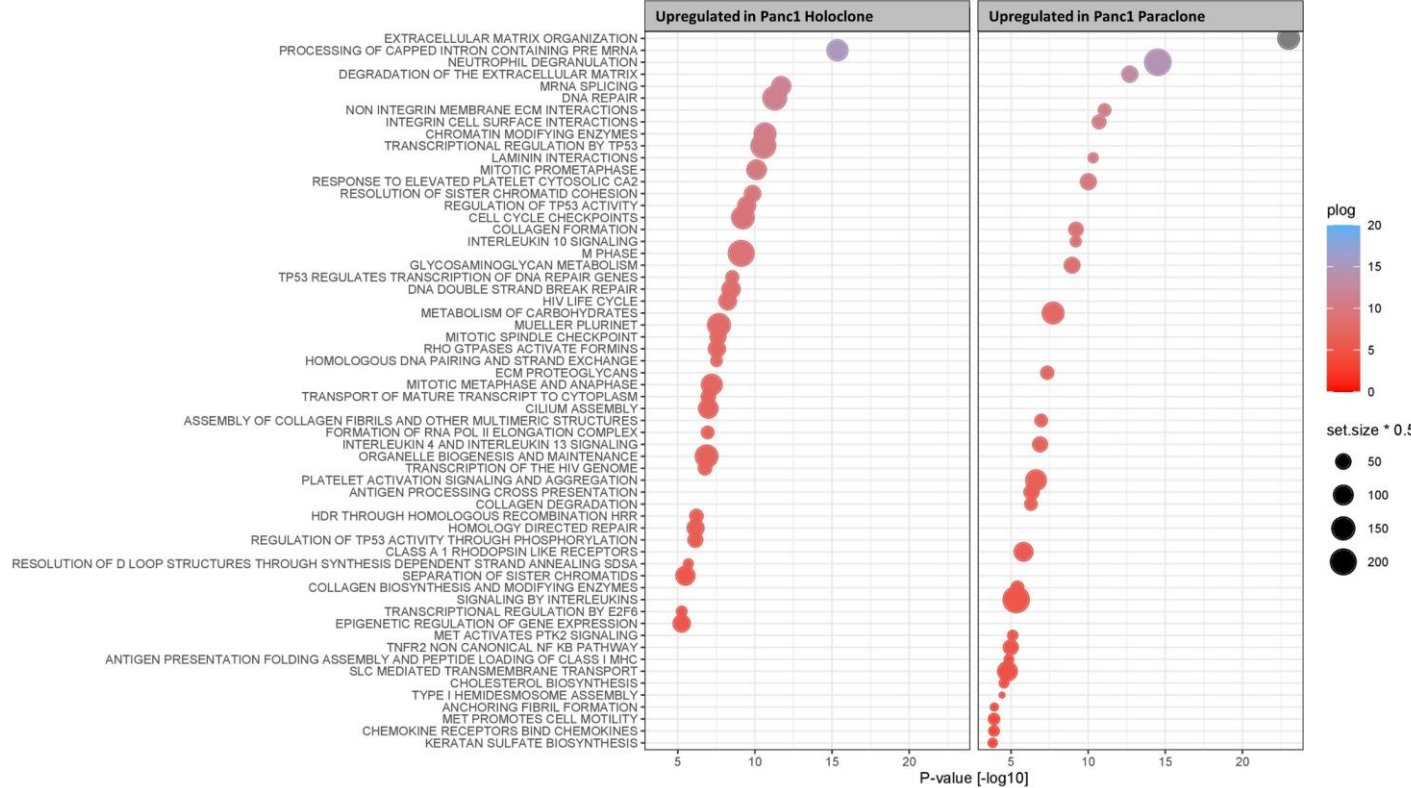

C)

Panc89 cell clones

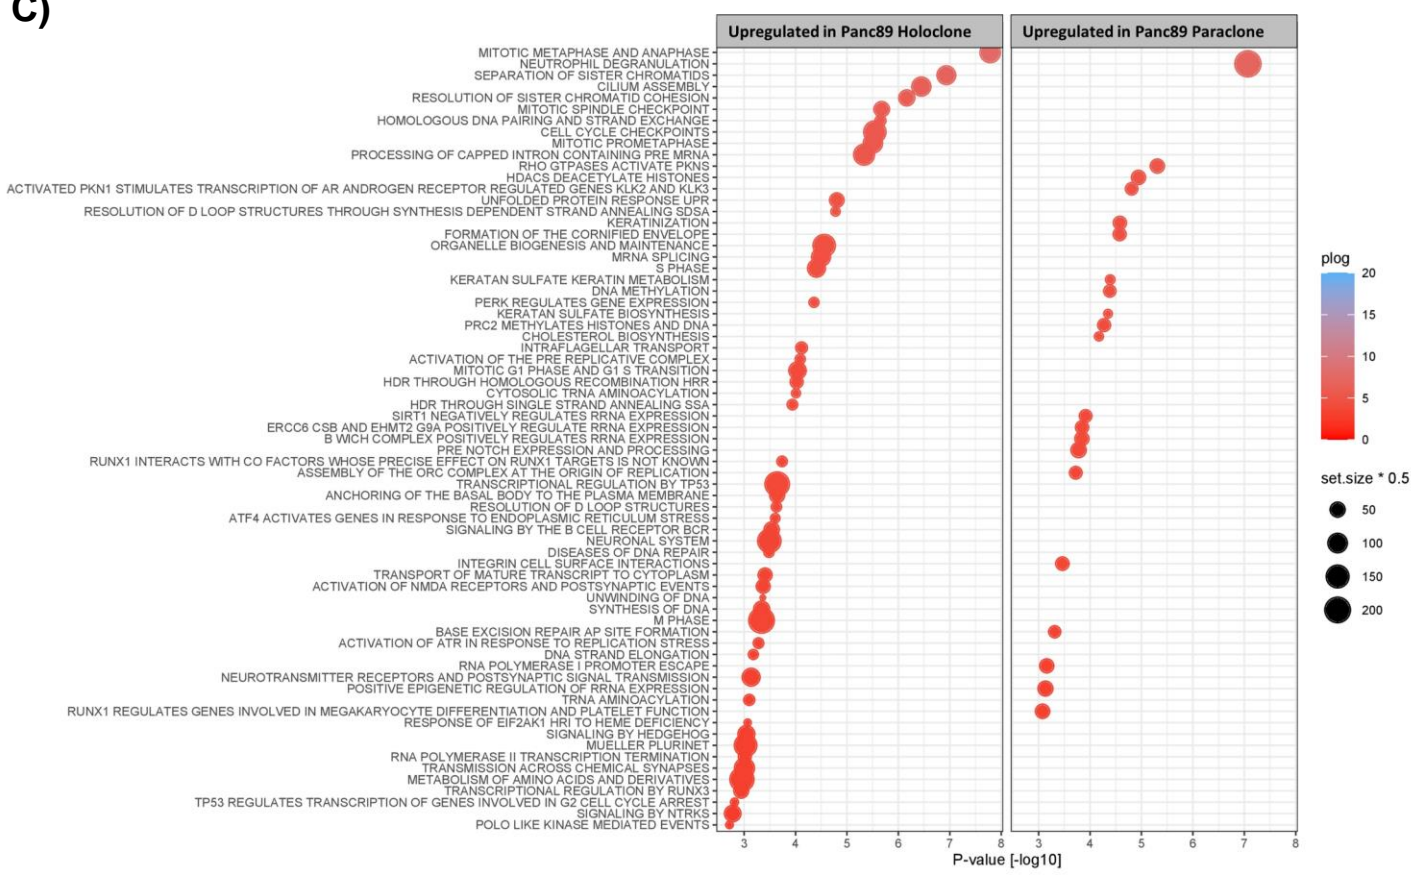

Supplementary Figure 1

D)

Basal-Like Top 25

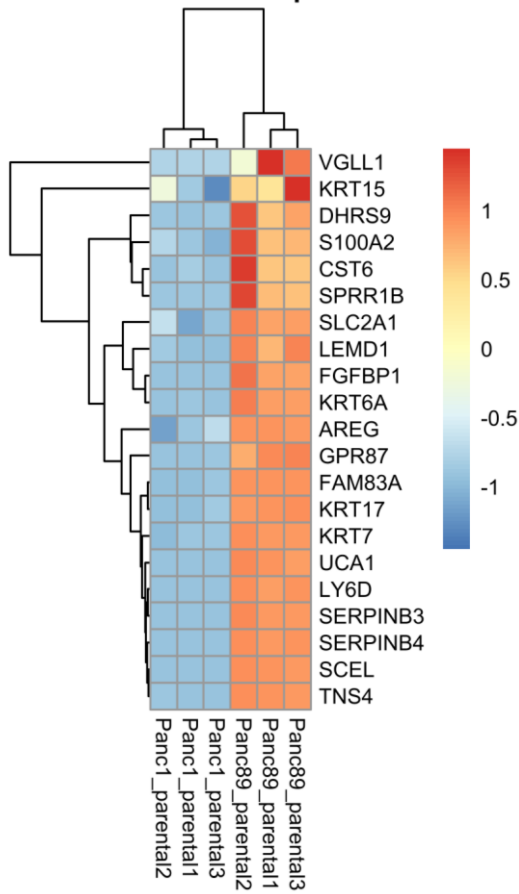

Classical Top 25

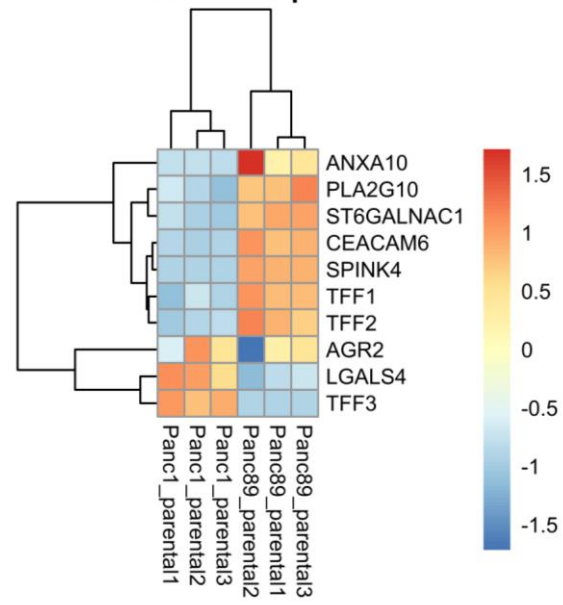

Basal Like Top 25

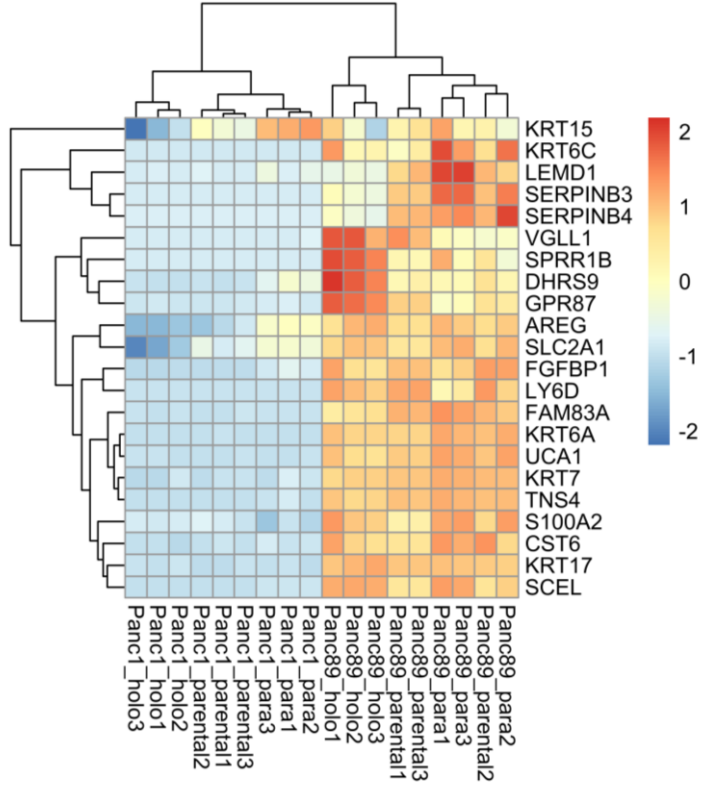

Supplement: Supplementary file 5 [file supplementary]
