# Supplementary figures and images for: Epithelial and Mesenchymal Pancreatic Cancer Cells Exhibit Different Stem Cell Phenotypes Being Associated with Different Metastatic Propensity
Source: Preprints.org preprint supplement (doi:10.20944/preprints202311.1083.v1), 2023-11-16

A)

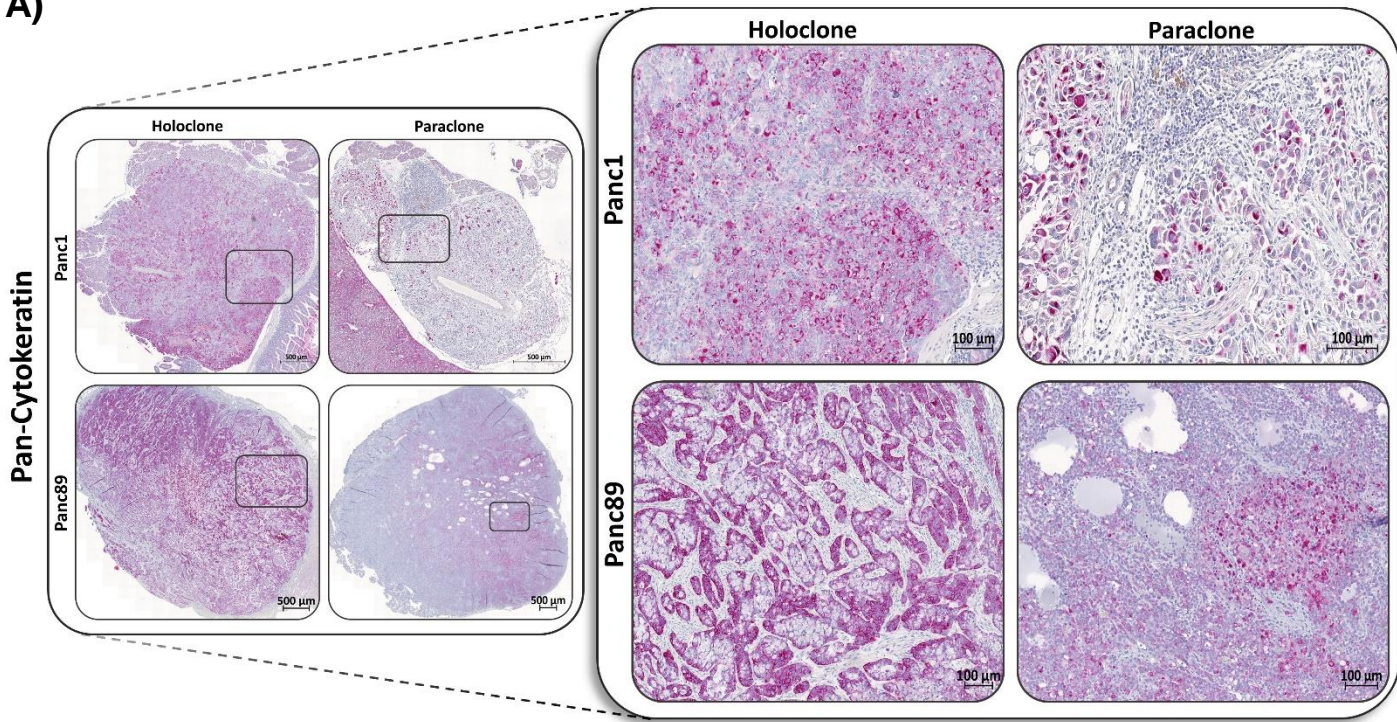

B)

Cyst formation in Panc89 Paraclone tumors

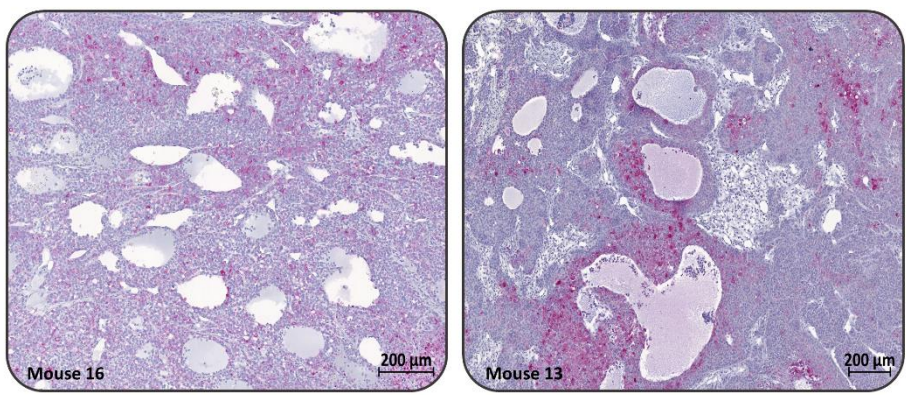

Supplement: Supplementary file 1 [file supplementary]

A)

Parental PDAC cells

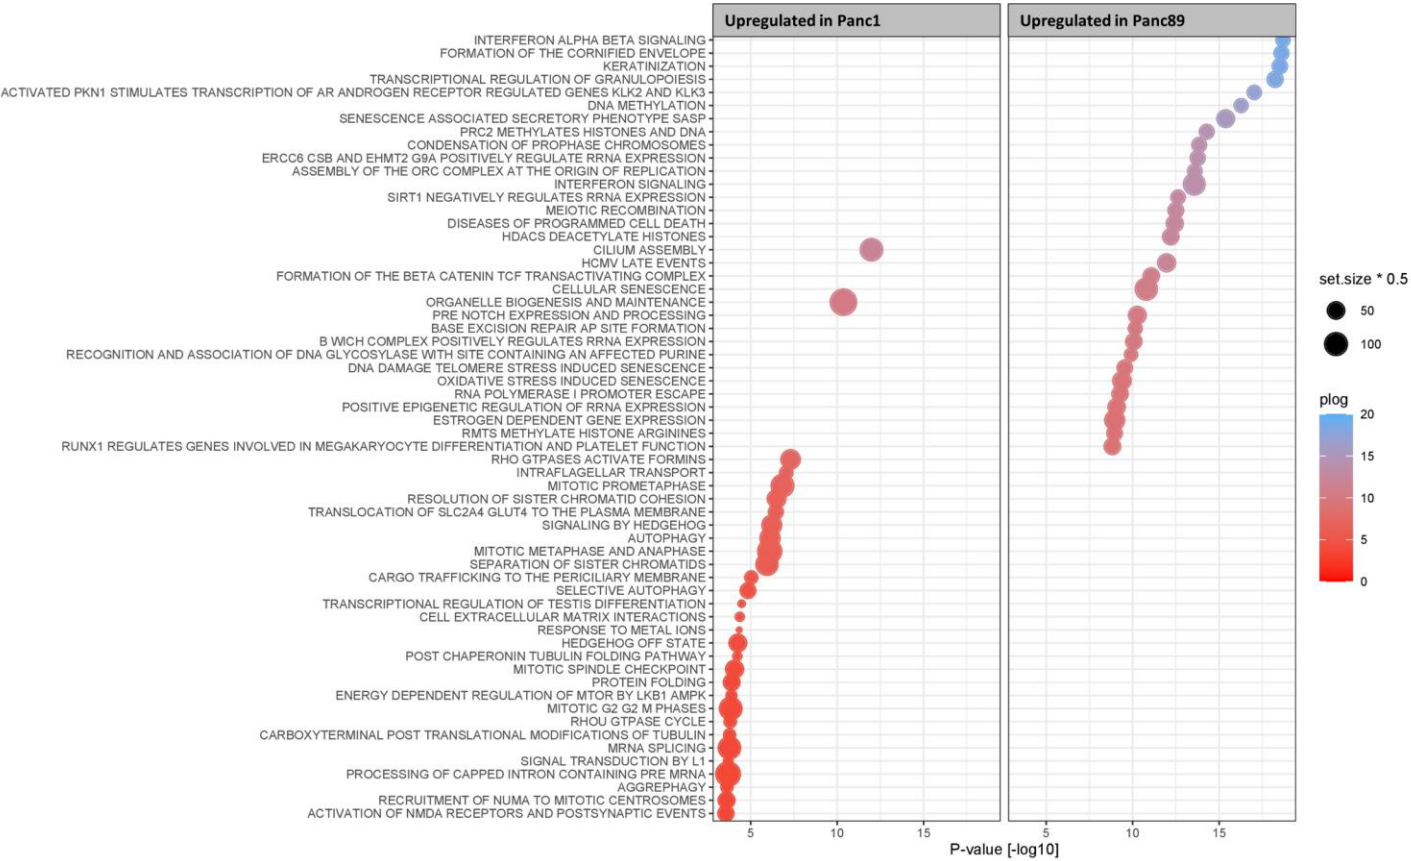

B)

Panc1 cell clones

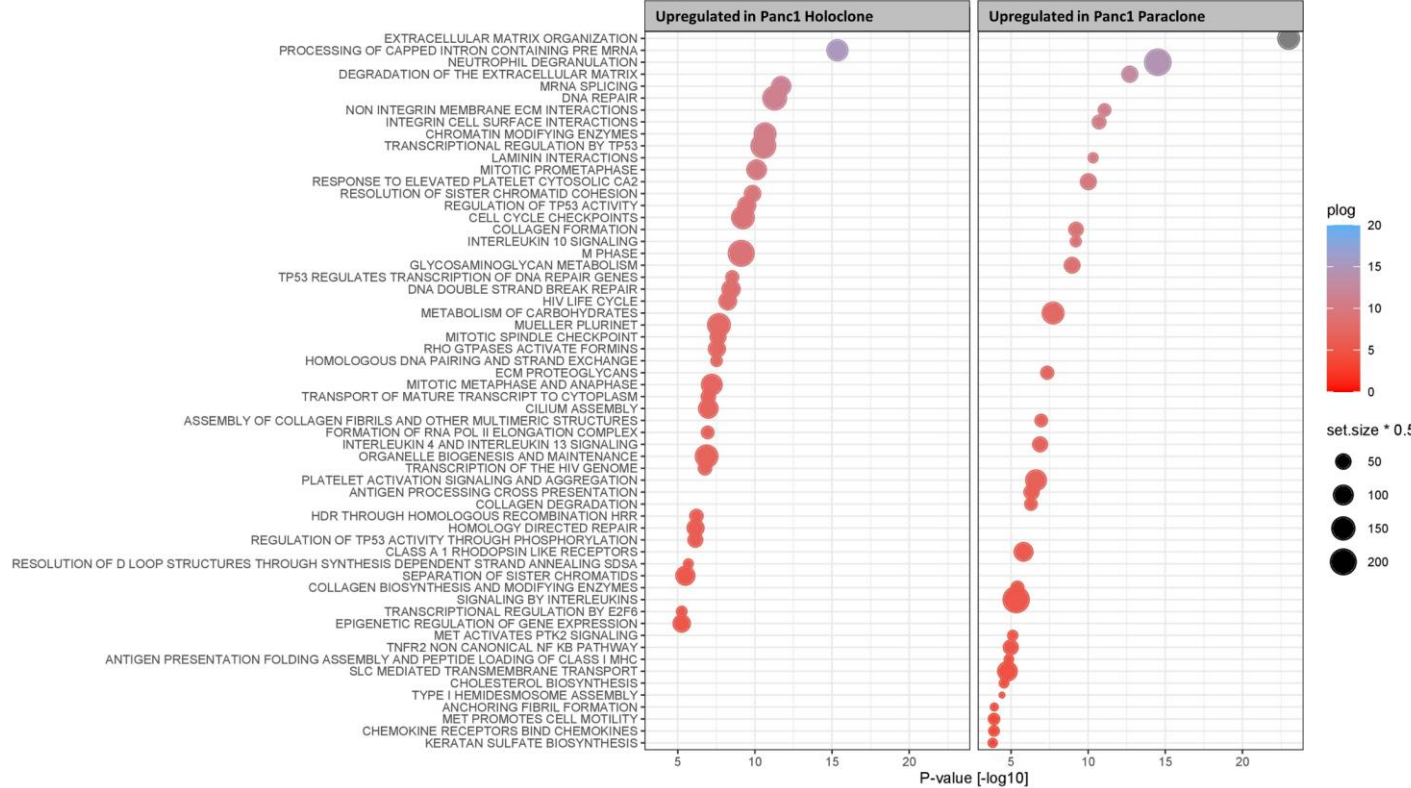

C)

Panc89 cell clones

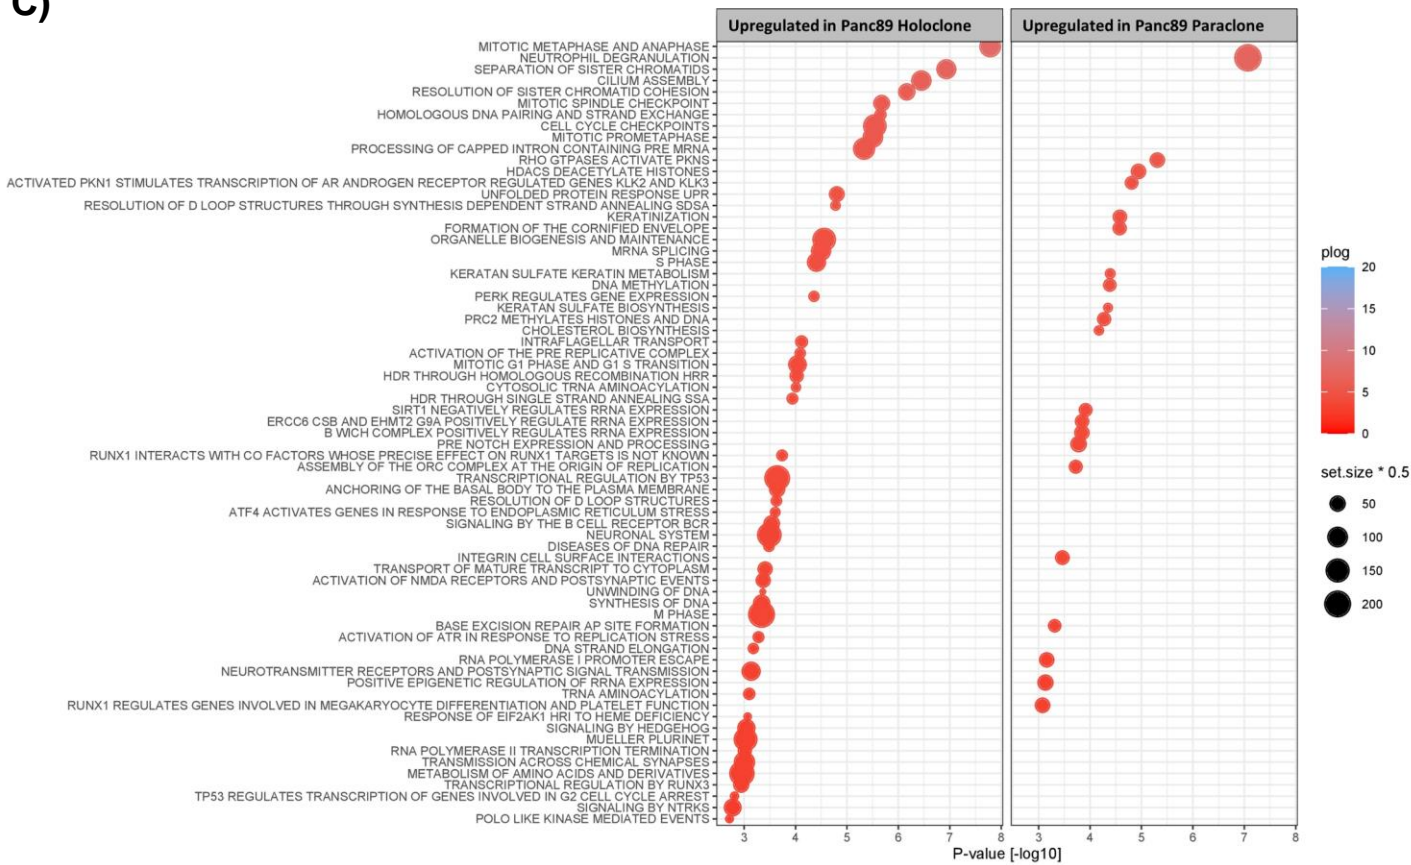

**D)**

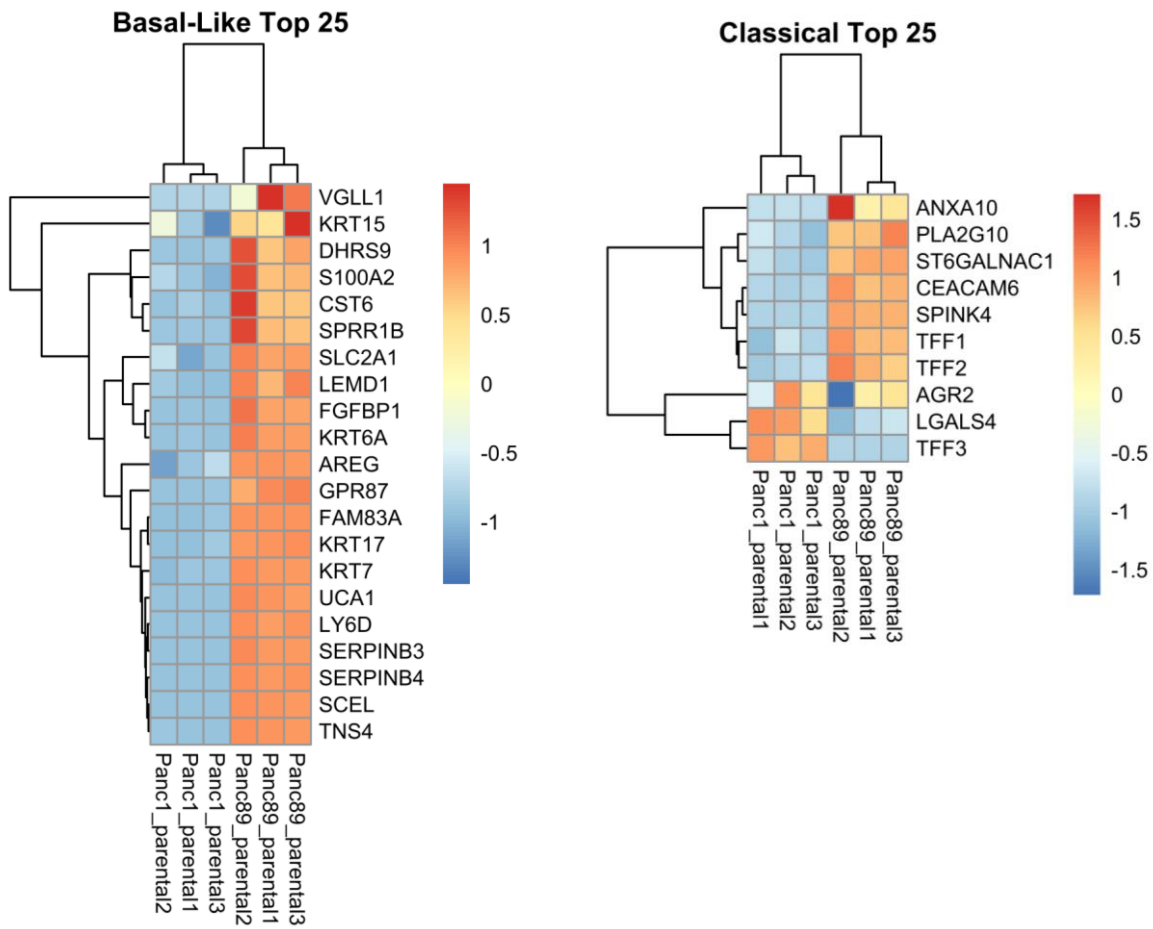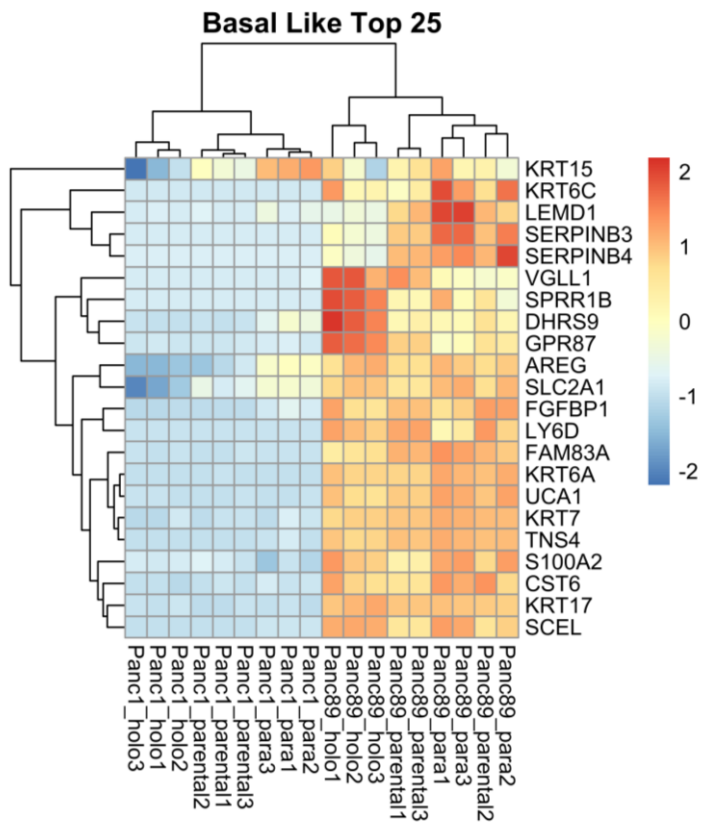

## Supplementary Figure 1

Supplement: Supplementary file 2 [file supplementary › Supplementary Figure 1.pdf]

**Total Panc89 Holoclone tumors**

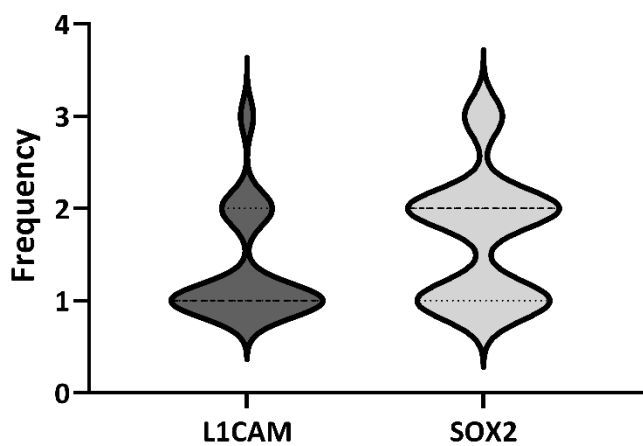

**L1CAM high Panc89 Holoclone tumors**

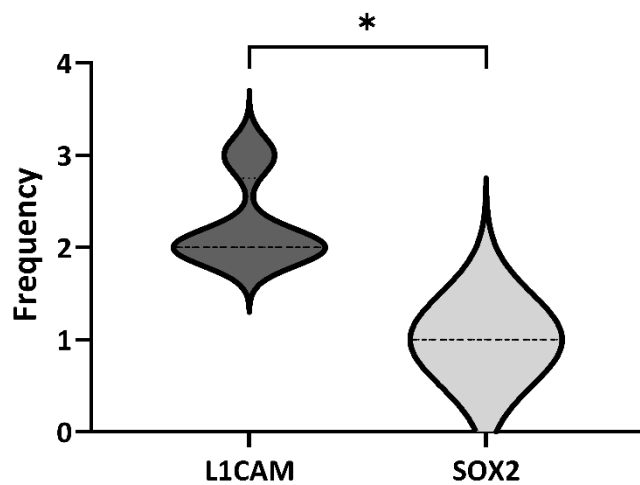

Supplement: Supplementary file 2 [file supplementary › Supplementary Figure 3.pdf]
